# Supplementary material for: External Validation of Model-Based Dosing Guidelines for Vancomycin, Gentamicin, and Tobramycin in Critically Ill Neonates and Children: A Pragmatic Two-Center Study
Source: PubMed Central journal article supplement — Paediatr Drugs. 2020 Jun 8;22(4):433–44. doi: 10.1007/s40272-020-00400-8 (PMC7383037; doi:10.1007/s40272-020-00400-8), 2020-06-08
Supplement: 40272_2020_400_MOESM1_ESM.pdf [file 40272_2020_400_MOESM1_ESM.pdf]

Article title: External validation of model-based dosing guidelines for vancomycin, gentamicin and tobramycin in critically ill neonates and children: a pragmatic two-center study

Journal name: Pediatric Drugs, 2020

Authors: Stan J.F. Hartman (MD), Lynn B. Orriëns (MSc), Samanta M. Zwaag (MSc), Tim Poel, Marika de Hoop (PharmD), Saskia N. de Wildt (MD, PhD)

Corresponding author: Saskia N. de Wildt (MD, PhD)

Affiliation corresponding author:

- Department of Pharmacology and Toxicology and Department of Intensive Care, Radboud Institute of Health Sciences, Radboudumc, Nijmegen, The Netherlands;
- Intensive Care and Department of Pediatric Surgery, Erasmus MC-Sophia Children's Hospital, University Medical Center Rotterdam, Rotterdam, The Netherlands;
- Dutch Knowledge Center Pharmacotherapy for Children, The Hague, The Netherlands

E-mail address corresponding author: [Saskia.deWildt@radboudumc.nl](mailto:Saskia.deWildt@radboudumc.nl)

Supplementary Figure 1:

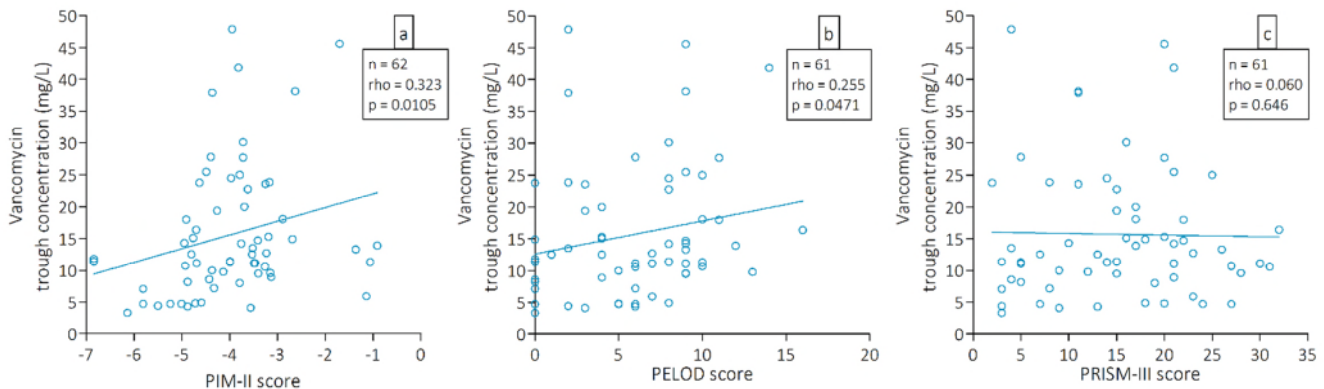

Supplementary Figure 1: correlation between disease severity scores (PIM-II score (left), PELOD score (middle) and PRISM-III and vancomycin trough concentrations in the vancomycin PICU cohort.

Legend: rho = Spearman's rho correlation coefficient; n = number of patients  
n deviates from total patient cohort due to missing disease severity score data.
